# Supplementary material
Source: PubMed Central journal article supplement (PMC5339345)
Supplement: mmc1.pdf [file mmc1.pdf]

**Supplemental Data**

**A Ribosomopathy Reveals Decoding**

**Defective Ribosomes Driving Human Dysmorphism**

**Nahuel A. Paolini, Martin Attwood, Samuel B. Sondalle, Carolina Marques dos Santos Vieira, Anita M. van Adrichem, Franca M. di Summa, Marie-Françoise O'Donohue, Pierre-Emmanuel Gleizes, Swaksha Rachuri, Joseph W. Briggs, Roman Fischer, Peter J. Ratcliffe, Marcin W. Wlodarski, Riekelt H. Houtkooper, Marieke von Lindern, Taco W. Kuijpers, Jonathan D. Dinman, Susan J. Baserga, Matthew E. Cockman, and Alyson W. MacInnes**



**Figure S1 (Related to Figure 1). Multiple sequence alignment for ribosomal protein uS12 in all domains of life reveals substitutions occur in highly conserved amino acids. (A)** Sanger sequencing of human fibroblasts from individuals reported with *RPS23* gene mutations reveal double peaks corresponding to Arg67 and Phe120 (right panels) compared to single peaks in healthy control cells (left panels). **(B)** The multiple sequence alignment was generated using ClustalX 2.1. Below the alignment is the quality curve plotting the conservation score for each residue. The symbols above residues in the alignment are defined as follows: “\*” indicates positions which have a single, fully conserved residue; “:” indicates a strongly conserved residue; “.” indicates a weakly conserved residue. Strong and weak are defined as a score of > 0.5 for strong and < 0.5 for weak according to the Gonnet Pam250 matrix. A red box outlines the invariant proline residue hydroxylated by OGFOD1. A blue box outlines the invariant arginine that is mutated to a lysine in uS12 in Individual 1. The phenylalanine that is mutated to an isoleucine in uS12 in Individual 2 is outlined by a green box, is invariant in Eukaryotes, and strongly conserved in Archaea and Bacteria which have a tyrosine at this residue. The locations of the PNSA and PGVRY domains in bacteria are labeled.

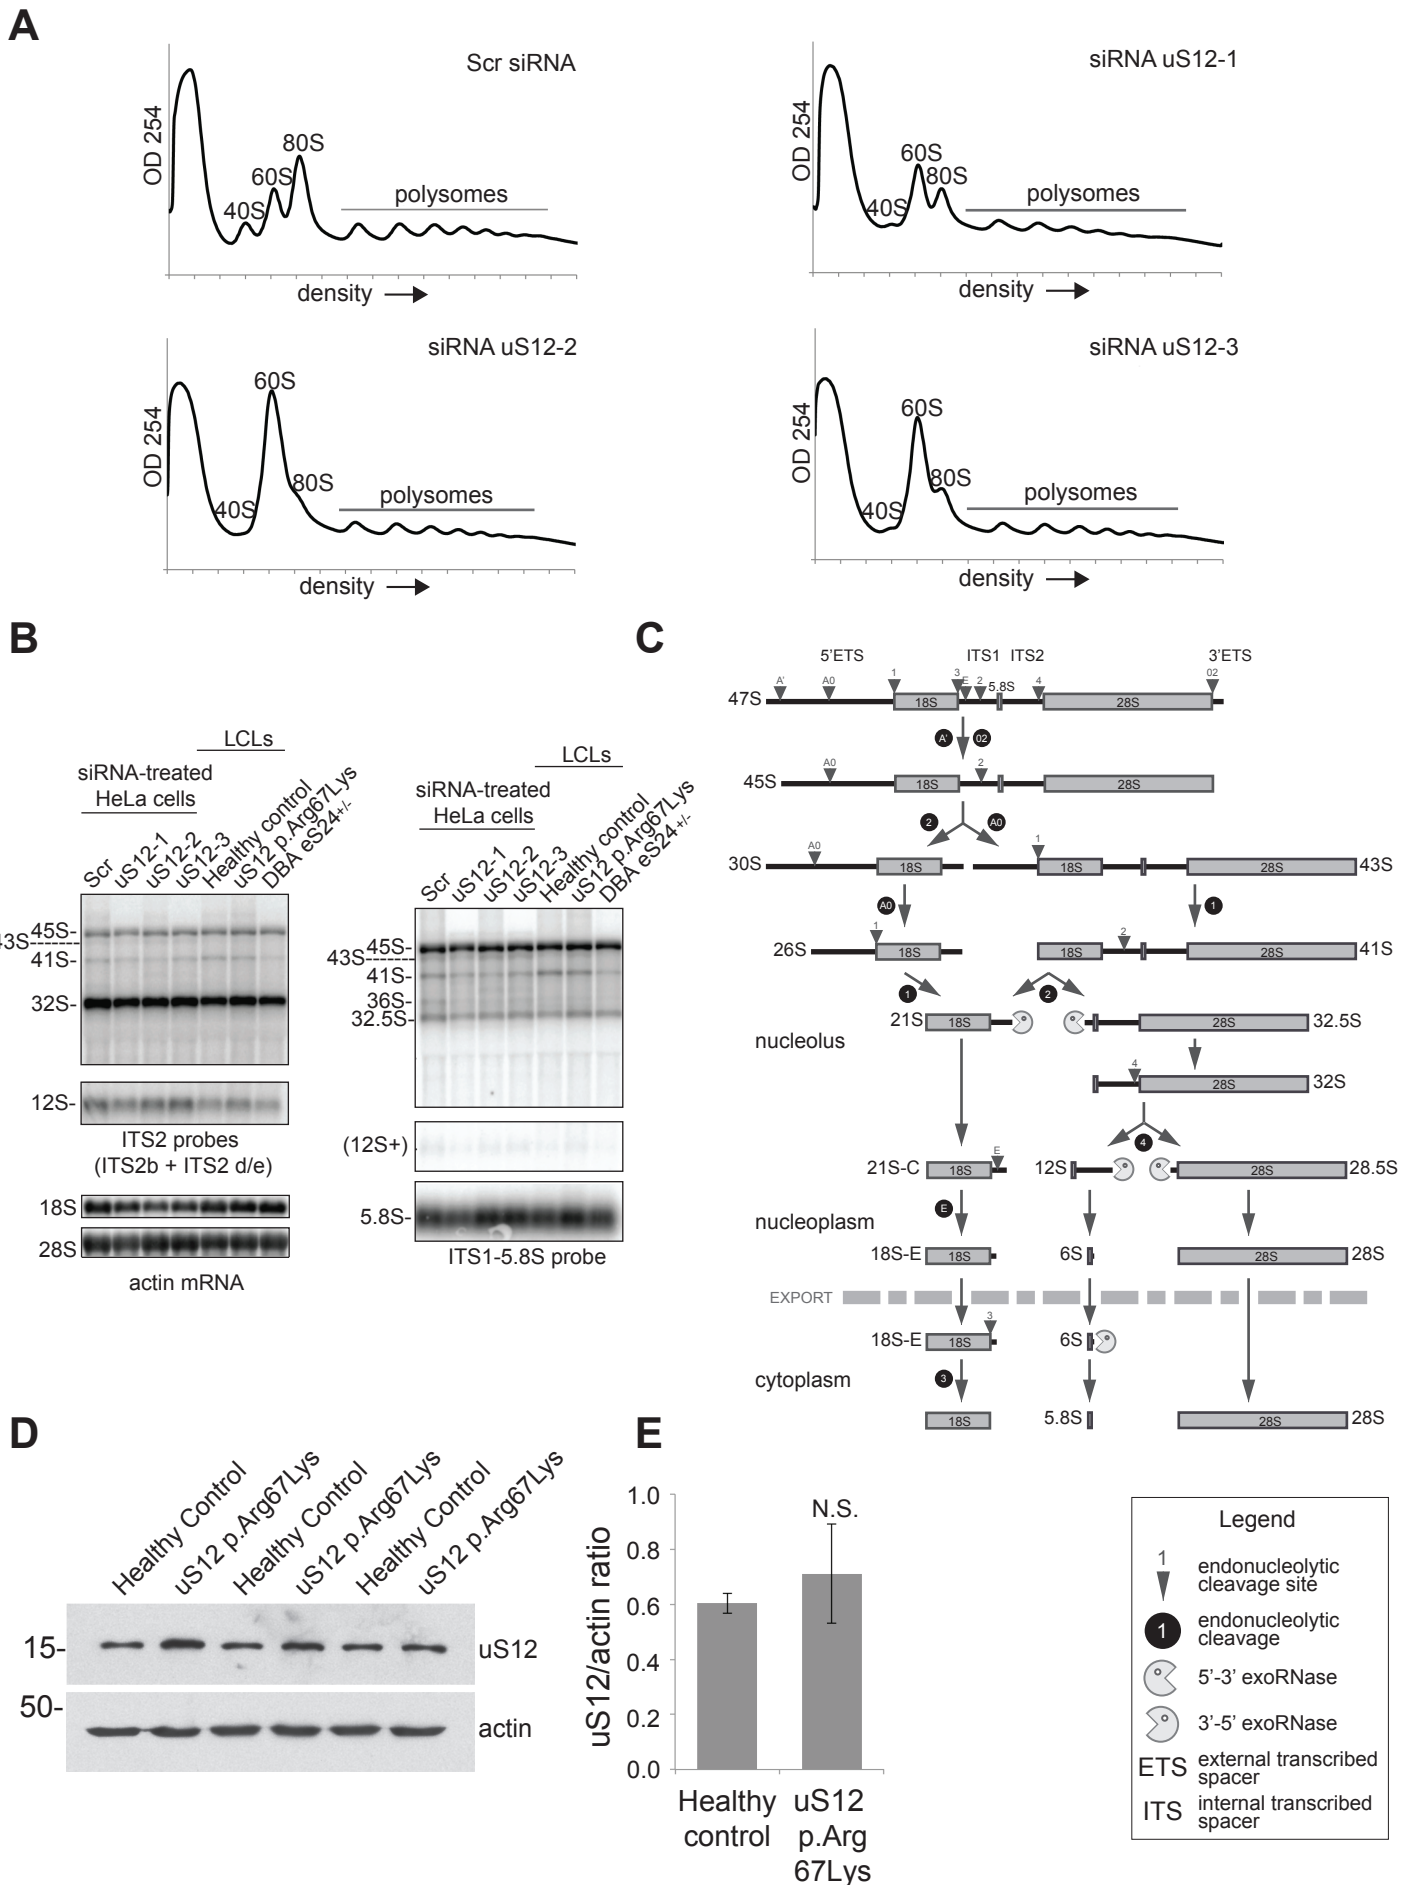



**Figure S2 (Related to Figure 2). uS12 p.Arg67Lys causes a mild and late ribosome biogenesis defect.** **(A)** Polysome profiles of HeLa cells transfected with a scrambled siRNA control or three different siRNAs against uS12. 40S, 60S, 80S peaks and polysomes are labeled. Note the reduction of the 40S peaks and concomitant increase of 60S peaks in all samples with siRNAs against uS12. **(B)** Northern blot analysis of rRNA processing in HeLa cells transfected with a scrambled (Scr) siRNA or siRNAs against uS12, as well as LCLs derived from a healthy control, the uS12 p.Arg67Lys individual, or a DBA individual with an eS24 mutation. ITS2 and ITS1-5.8S probes are shown along with actin as a loading control. **(C)** A schematic and legend of the rRNA processing pathway in mammalian cells. **(D)** Western blot analysis of uS12 protein levels in healthy control and uS12 p.Arg67Lys LCLs. 3 independent experiments are shown. N.S. = not significant. **(E)** Quantification of uS12 protein levels from (D).

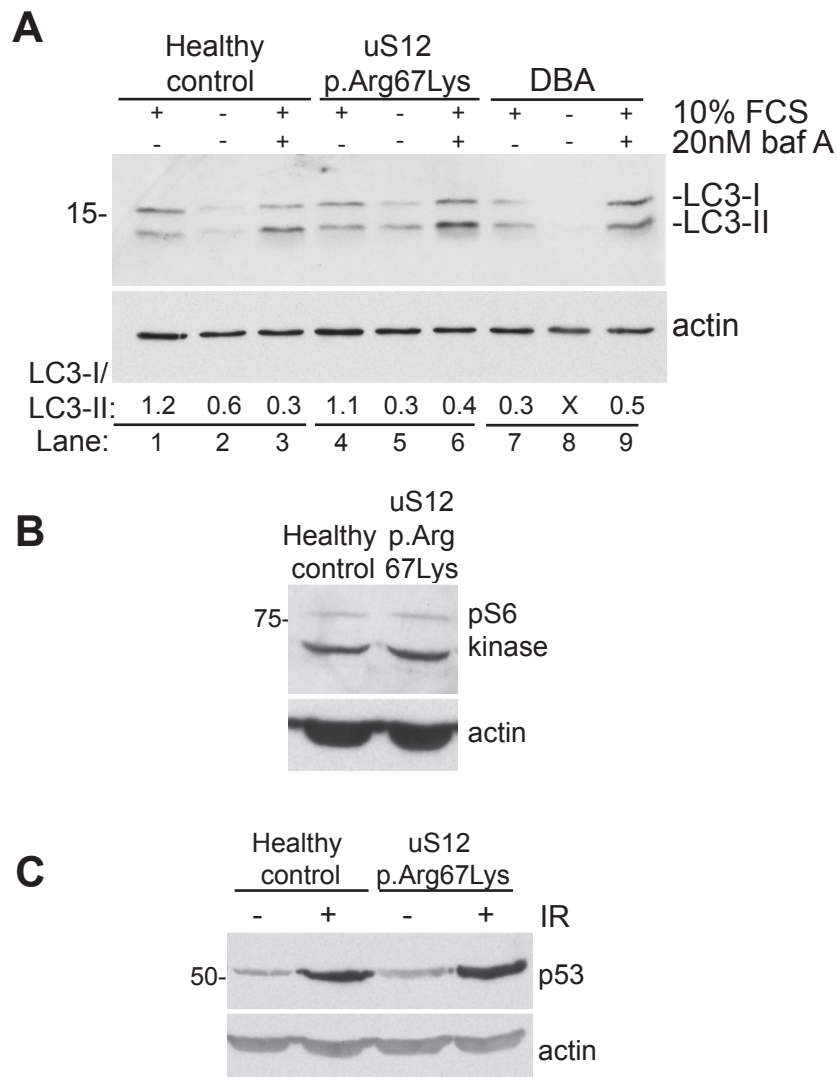

**Figure S3 (Related to Figure 2). uS12 p.Arg67Lys does not induce autophagy, activate S6 kinase signaling, or stabilize p53. (A)** Representative western blot analysis of LC3-I and LC3-II protein levels in fibroblasts derived from a healthy control, the uS12 p.Arg67Lys individual, or a DBA individual with a RP mutation. -10% FCS indicates samples starved of serum overnight. 20mM bafilomycin A was added for 6 hours to block autophagosome fusion with lysosomes and to provide a positive control for LC3-II accumulation. Ratios of LC3-I to LC3-II are calculated and listed. **(B)** Representative western blot analysis of S6 kinase phosphorylation in LCLs from the uS12 p.Arg67Lys individual or a healthy control. **(C)** Representative western blot analysis of p53 stabilization in LCLs with the uS12 p.Arg67Lys variant or from a healthy control either untreated or exposed to 25 Gy ionizing radiation (IR). In all cases biological triplicates were performed.

**A**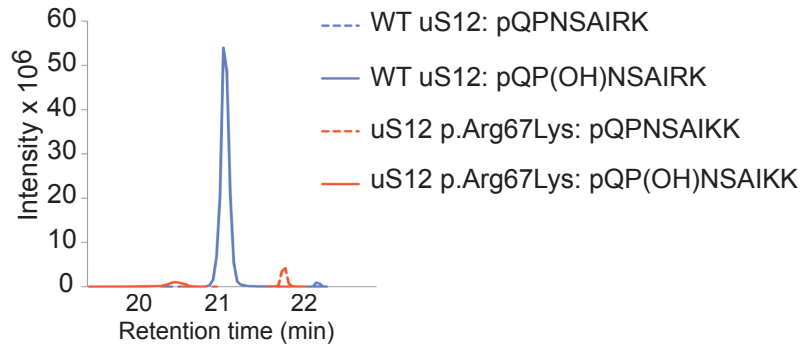**B**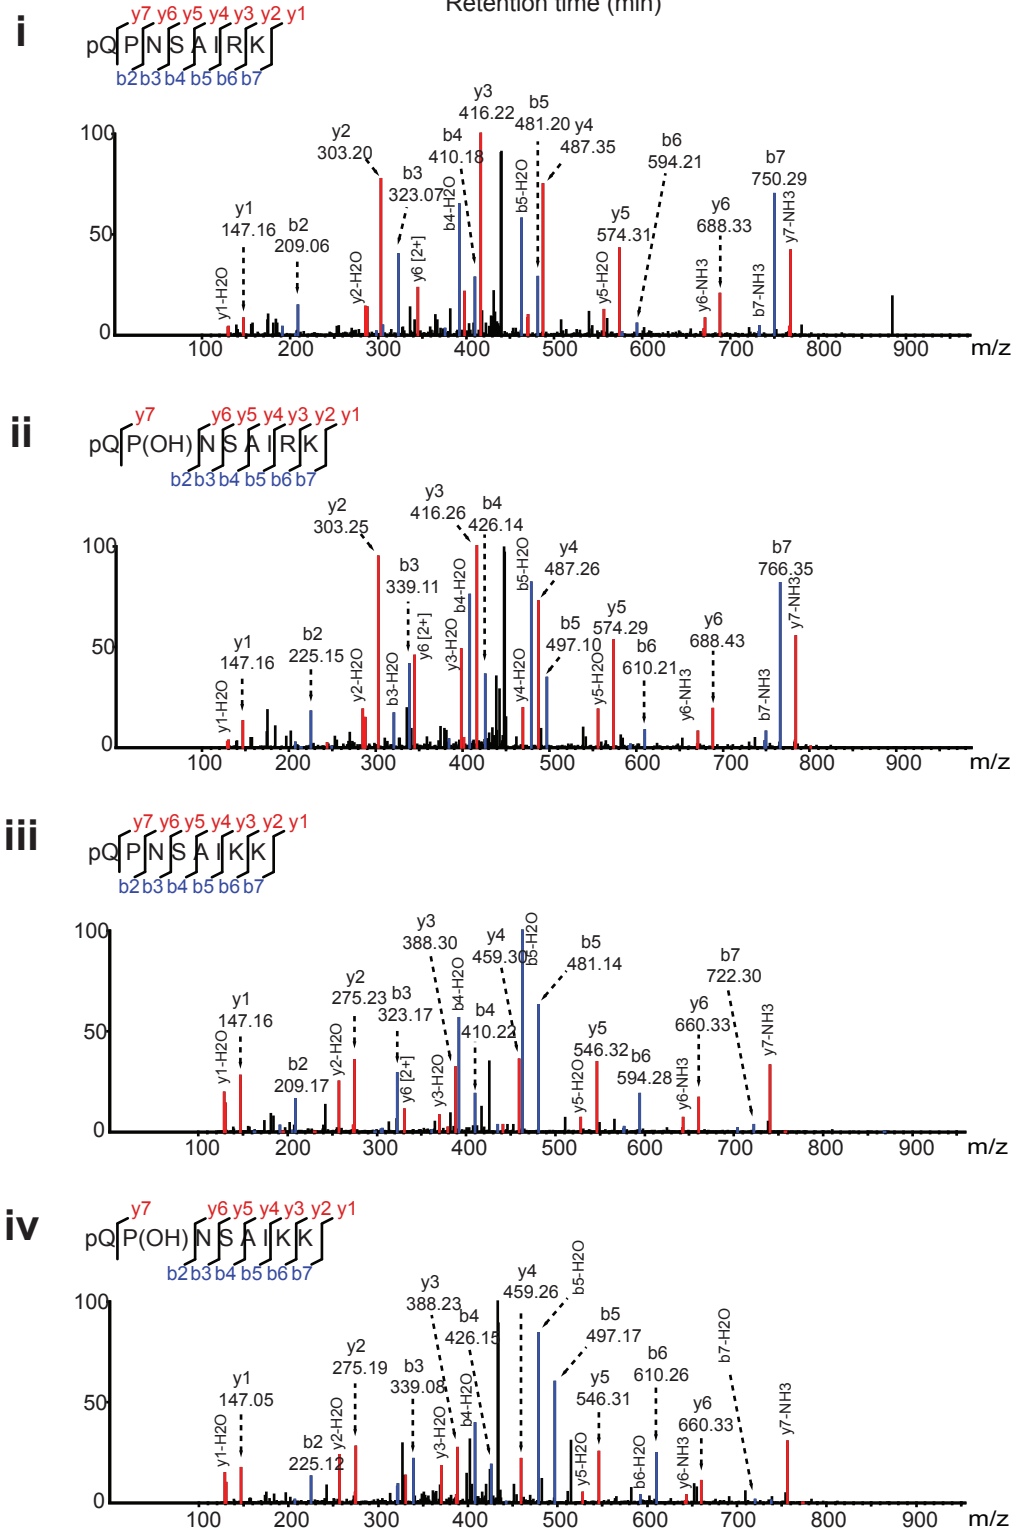

**Figure S4 (Related to Figure 4). Comparative assessment of wild-type and variant uS12 hydroxylation in LCLs. (A)** Exemplar chromatogram indicating elution time and intensity of extracted ion masses corresponding to the following pyro-Glu (pQ) modified  $[M+H]^{2+}$  uS12<sub>61-68</sub> species: non-hydroxylated wild type (dashed blue line; m/z 448.751); hydroxylated wild type (solid blue line; m/z 456.749); non-hydroxylated p.Arg67Lys (dashed red line; m/z 434.748); hydroxylated p.Arg67Lys (solid red line; m/z 442.746). See Table S1 for summary of peptide level counts used for relative quantitation in Figure 4. **(B)** Corresponding uS12 fragmentation spectra **(i)** wild type non-hydroxylated; **(ii)** wild type hydroxylated; **(iii)** p.Arg67Lys non-hydroxylated; **(iv)** p.Arg67Lys hydroxylated.

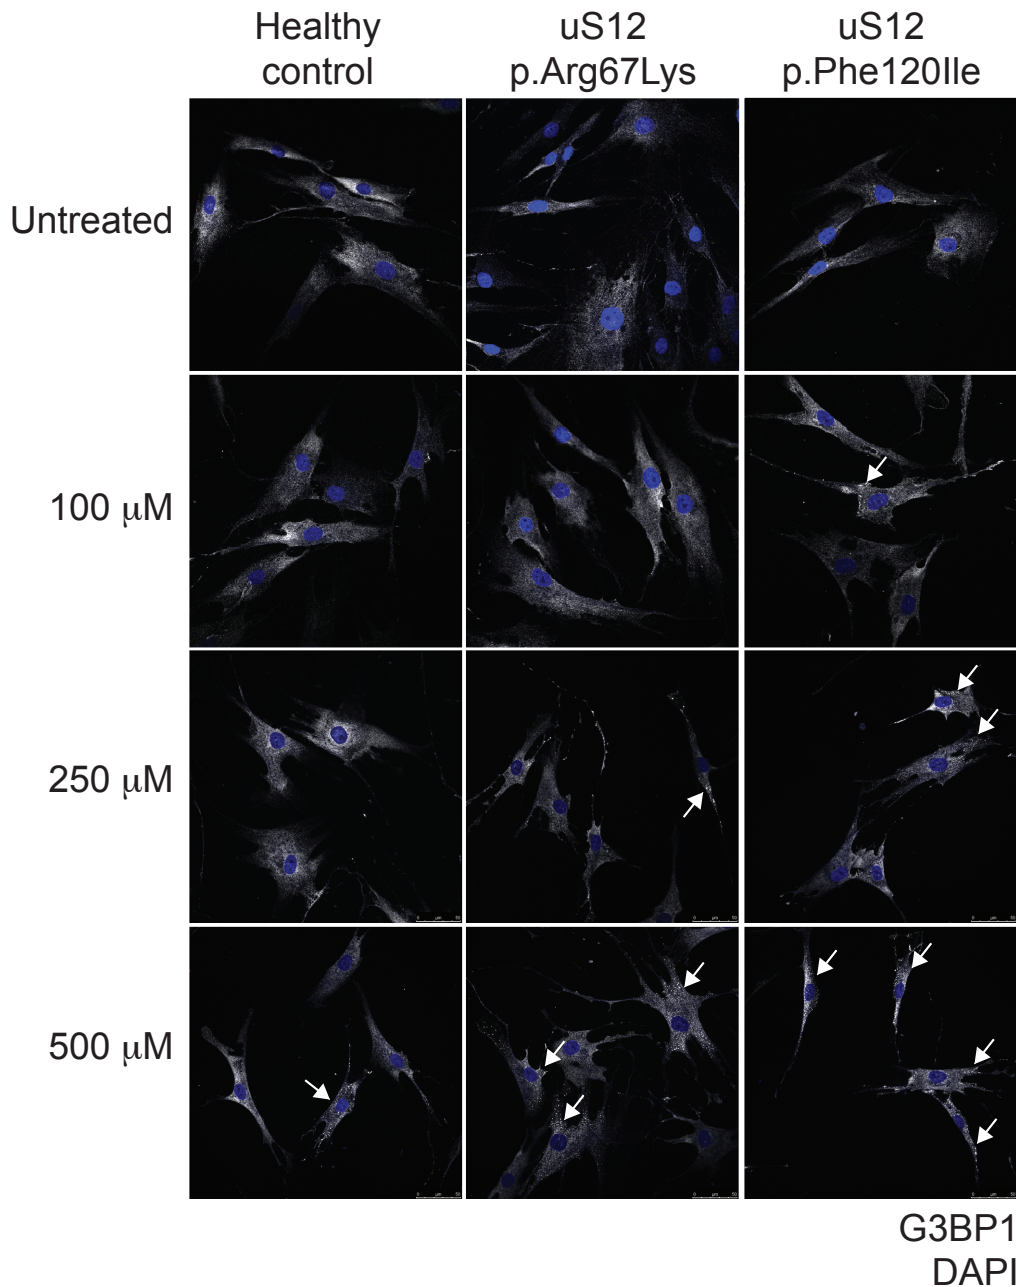

**Figure S5 (Related to Figure 5).** The uS12 variants increase stress granule formation in fibroblasts. Confocal microscopy of fibroblasts either untreated or treated with 100, 250, or 500 μM arsenite for 30 minutes, stained with antibodies against G3BP1 (grey), and labeled with DAPI (blue). Arrows indicate stress granule positive cells.

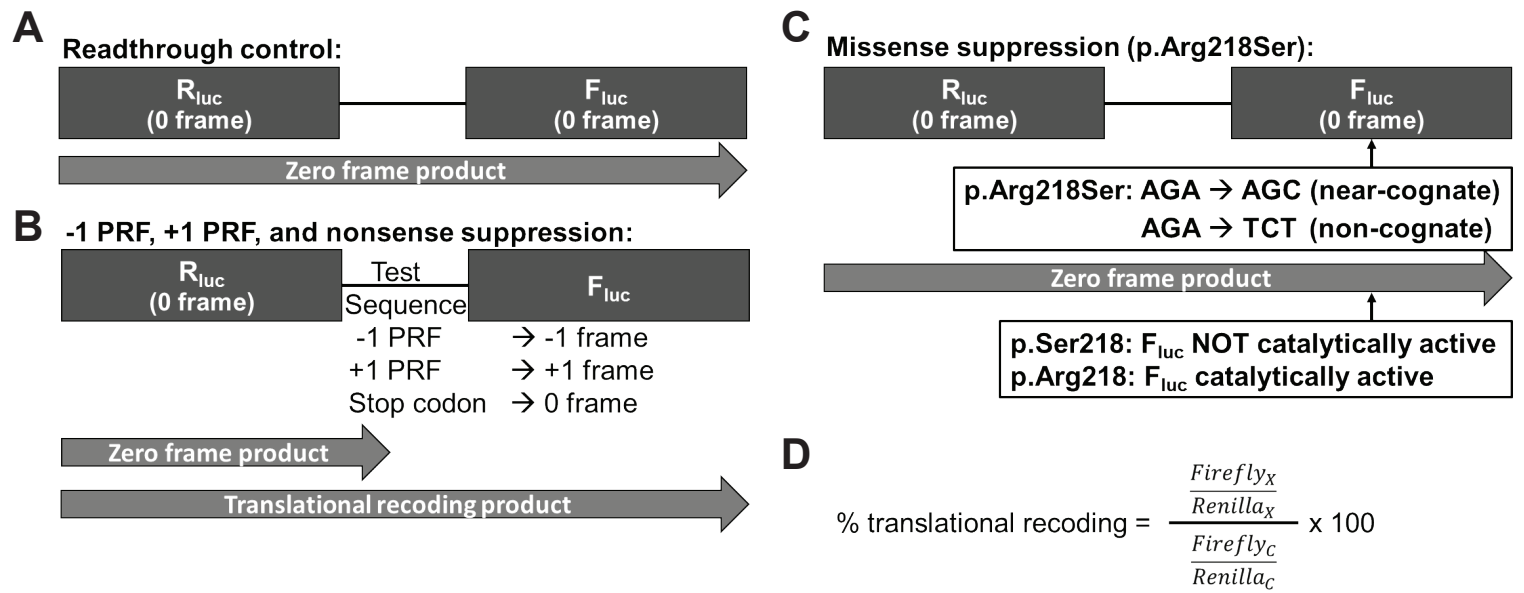

**Figure S6 (Related to Figure 5). Translational fidelity dual luciferase reporters used to assay: (A) Readthrough control; (B) -1 PRF, +1 PRF, and nonsense suppression; and (C) missense suppression. (D) Formula to calculate translational recoding efficiency. x stands for experimental and c for control.**

| Peptide                                              |                   | Patient #1 |       | Patient #2 |       | Patient #3 |       | Patient #4 |       | Patient: #5 |       | Control #1 |       | Control #2 |       | Control #3 |       |
|------------------------------------------------------|-------------------|------------|-------|------------|-------|------------|-------|------------|-------|-------------|-------|------------|-------|------------|-------|------------|-------|
|                                                      |                   | XIC        | % OH  | XIC         | %OH   | XIC        | %OH   | XIC        | %OH   | XIC        | %OH   |
| Arg67Lys <sub>(61-67)</sub> : QPNSAIK                | P62               | 4.4E+07    | 23.76 | 1.7E+07    | 7.75  | 4.3E+07    | 16.22 | 3.4E+06    | 56.18 | 2.8E+06     | 30.00 | ND         |       | ND         |       | ND         |       |
|                                                      | P62(OH)           | 1.4E+07    |       | 1.4E+06    |       | 8.2E+06    |       | 4.4E+06    |       | 1.2E+06     |       | ND         |       | ND         |       |            |       |
| WT <sub>(61-67)</sub> : QPNSAIR                      | P62               | 1.6E+08    | 97.62 | 1.8E+08    | 91.74 | 1.1E+08    | 93.64 | 8.9E+06    | 96.43 | 4.0E+06     | 95.42 | 7.4E+06    | 99.57 | 2.1E+07    | 99.37 | 5.0E+06    | 99.36 |
|                                                      | P62(OH)           | 6.4E+09    |       | 2.0E+09    |       | 1.6E+09    |       | 2.4E+08    |       | 8.4E+07     |       | 1.7E+09    |       | 3.3E+09    |       | 7.7E+08    |       |
| Arg67Lys <sub>(61-67)</sub> : QPN(+.98)SAIK          | P62               | 8.5E+06    |       | 1.1E+06    |       | 4.1E+06    |       | <LOD       |       | <LOD        |       | ND         |       | ND         |       | ND         |       |
|                                                      | P62(OH)           | <LOD       |       | <LOD       |       | <LOD       |       | <LOD       |       | <LOD        |       | ND         |       | ND         |       |            |       |
| WT <sub>(61-67)</sub> : QPN(+.98)SAIR                | P62               | 1.2E+07    | 98.66 | 1.6E+07    | 93.92 | 1.2E+07    | 95.22 | 1.1E+05    | 99.59 | <LOD        |       | 2.4E+05    | 99.83 | 5.1E+05    | 99.84 | 1.3E+05    | 99.89 |
|                                                      | P62(OH)           | 9.2E+08    |       | 2.4E+08    |       | 2.8E+07    |       | <LOD       |       | 1.4E+08     |       | 3.2E+08    |       | 1.2E+08    |       |            |       |
| Arg67Lys <sub>(61-68)</sub> : QPNSAIKK               | P62               | 1.8E+07    | 51.36 | 6.4E+06    | 32.62 | 2.7E+07    | 33.91 | 3.3E+06    | 49.19 | 4.1E+06     | 29.85 | ND         |       | ND         |       | ND         |       |
|                                                      | P62(OH)           | 1.9E+07    |       | 3.1E+06    |       | 1.4E+07    |       | 3.2E+06    |       | 1.7E+06     |       | ND         |       | ND         |       |            |       |
| WT <sub>(61-68)</sub> : QPNSAIRK                     | P62               | 2.0E+06    | 99.41 | 2.2E+07    | 96.19 | 1.3E+07    | 97.01 | 1.1E+06    | 98.75 | 1.3E+06     | 97.25 | 1.1E+05    | 99.72 | 1.0E+06    | 99.60 | <LOD       |       |
|                                                      | P62(OH)           | 3.4E+08    |       | 5.4E+08    |       | 4.1E+08    |       | 8.5E+07    |       | 4.7E+07     |       | 4.0E+07    |       | 2.5E+08    |       | 7.7E+07    |       |
| Arg67Lys <sub>(61-68)</sub> : QPN(+.98)SAIKK         | P62               | 6.9E+06    | 43.93 | 1.5E+06    | 17.70 | 7.0E+06    | 24.06 | 7.3E+05    | 34.45 | <LOD        |       | ND         |       | ND         |       | ND         |       |
|                                                      | P62(OH)           | 5.4E+06    |       | 3.2E+05    |       | 2.2E+06    |       | 3.8E+05    |       | <LOD        |       | ND         |       | ND         |       |            |       |
| WT <sub>(61-68)</sub> : QPN(+.98)SAIRK               | P62               | 5.4E+05    | 99.64 | 3.9E+06    | 94.70 | 2.7E+06    | 94.80 | 2.2E+05    | 98.07 | 1.6E+05     | 98.04 | 1.1E+05    | 97.56 | 2.5E+05    | 99.63 | 1.9E+07    |       |
|                                                      | P62(OH)           | 1.5E+08    |       | 6.9E+07    |       | 4.9E+07    |       | 1.1E+07    |       | 7.9E+06     |       | 4.2E+06    |       | 6.8E+07    |       |            |       |
| Arg67Lys <sub>(61-68)</sub> : Q(-17.03)PNSAIKK       | P62               | 5.6E+07    | 45.27 | 2.6E+07    | 48.09 | 3.6E+08    | 18.21 | 2.0E+07    | 40.68 | 2.8E+07     | 19.18 | ND         |       | ND         |       | ND         |       |
|                                                      | P62(OH)           | 4.7E+07    |       | 2.4E+07    |       | 8.1E+07    |       | 1.4E+07    |       | 6.6E+06     |       | ND         |       | ND         |       |            |       |
| WT <sub>(61-68)</sub> : Q(-17.03)PNSAIRK             | P62               | 4.0E+06    | 99.56 | 4.8E+07    | 96.42 | 8.0E+07    | 96.76 | 4.2E+06    | 98.91 | 6.7E+06     | 98.57 | 1.5E+06    | 99.23 | 3.5E+06    | 99.57 | 6.7E+05    | 99.77 |
|                                                      | P62(OH)           | 9.0E+08    |       | 1.3E+09    |       | 2.4E+09    |       | 3.8E+08    |       | 4.6E+08     |       | 1.9E+08    |       | 8.2E+08    |       | 3.0E+08    |       |
| Arg67Lys <sub>(61-68)</sub> : Q(-17.03)PN(+.98)SAIKK | P62               | 1.1E+07    | 23.28 | 5.1E+06    | 46.59 | 5.2E+07    | 18.08 | 3.8E+06    | 33.58 | 4.4E+06     | 14.92 | ND         |       | ND         |       | ND         |       |
|                                                      | P62(OH)           | 3.2E+06    |       | 4.4E+06    |       | 1.2E+07    |       | 1.9E+06    |       | 7.8E+05     |       | ND         |       | ND         |       |            |       |
| WT <sub>(61-68)</sub> : Q(-17.03)PN(+.98)SAIRK       | P62               | 1.8E+06    | 99.36 | 1.4E+07    | 95.42 | 1.4E+07    | 96.60 | 8.6E+05    | 98.54 | 9.9E+05     | 97.96 | 2.5E+05    | 99.53 | 1.4E+06    | 99.33 | 4.0E+05    | 99.36 |
|                                                      | P62(OH)           | 2.7E+08    |       | 2.9E+08    |       | 3.9E+08    |       | 5.8E+07    |       | 4.8E+07     |       | 5.2E+07    |       | 2.1E+08    |       | 6.3E+07    |       |
| Arg67Lys <sub>(55-67)</sub> : VGVEAKQPNSAIK          | P62               | 1.1E+06    |       | <LOD       |       | 7.6E+05    |       | <LOD       |       | <LOD        |       | ND         |       | ND         |       | ND         |       |
|                                                      | P62(OH)           | <LOD       |       | <LOD       |       | <LOD       |       | <LOD       |       | <LOD        |       | ND         |       | ND         |       |            |       |
| WT <sub>(55-67)</sub> : VGVEAKQPNSAIR                | P62               | 3.2E+05    | 98.17 | 9.9E+05    | 95.47 | 1.4E+06    | 95.51 | 6.6E+04    | 98.68 | 5.9E+04     | 99.37 | 2.9E+05    | 99.36 | 5.7E+04    | 99.62 | 5.9E+04    | 99.44 |
|                                                      | P62(OH)           | 1.7E+07    |       | 2.1E+07    |       | 3.0E+07    |       | 4.9E+06    |       | 9.3E+06     |       | 4.4E+07    |       | 1.5E+07    |       | 1.1E+07    |       |
| Arg67Lys <sub>(55-67)</sub> : VGVEAK(+43.01)QPNSAIK  | P62               | 3.2E+06    | 44.90 | <LOD       |       | <LOD       |       | <LOD       |       | <LOD        |       | ND         |       | ND         |       | ND         |       |
|                                                      | P62(OH)           | 2.6E+06    |       | <LOD       |       | <LOD       |       | <LOD       |       | <LOD        |       | ND         |       | ND         |       |            |       |
| WT <sub>(55-67)</sub> : VGVEAK(+43.01)QPNSAIR        | P62               | 7.1E+06    | 97.64 | 1.6E+06    | 92.92 | 1.7E+05    | 95.47 | <LOD       |       | <LOD        |       | 7.5E+05    | 99.56 | 2.3E+05    | 99.27 | 5.0E+04    | 96.38 |
|                                                      | P62(OH)           | 2.9E+08    |       | 2.1E+07    |       | 3.6E+06    |       | 4.6E+05    |       | 1.3E+06     |       | 1.7E+08    |       | 3.1E+07    |       | 1.3E+06    |       |
| Arg67Lys <sub>(55-67)</sub> : VGVEAK(+57.02)QPNSAIK  | P62               | 7.8E+05    |       | <LOD       |       | 7.6E+05    |       | <LOD       |       | <LOD        |       | ND         |       | ND         |       | ND         |       |
|                                                      | P62(OH)           | <LOD       |       | <LOD       |       | <LOD       |       | <LOD       |       | <LOD        |       | ND         |       | ND         |       |            |       |
| WT <sub>(55-67)</sub> : VGVEAK(+57.02)QPNSAIR        | P62               | 5.4E+05    | 97.16 | 1.8E+06    | 59.20 | 2.4E+05    | 95.93 | 2.5E+05    | 82.59 | 1.2E+05     | 74.80 | 4.8E+05    | 93.85 | 9.0E+05    | 71.39 | 2.2E+05    | 90.94 |
|                                                      | P62(OH)           | 1.8E+07    |       | 2.6E+06    |       | 5.8E+06    |       | 1.2E+06    |       | 3.5E+05     |       | 7.3E+06    |       | 2.2E+06    |       |            |       |
| Arg67Lys                                             | TOTAL XIC P62     | 1.5E+08    | 37.75 | 5.6E+07    | 36.99 | 5.0E+08    | 19.00 | 3.2E+07    | 43.00 | 3.9E+07     | 20.87 |            |       |            |       |            |       |
|                                                      | TOTAL XIC P62(OH) | 9.0E+07    |       | 3.3E+07    |       | 1.2E+08    |       | 2.4E+07    |       | 1.0E+07     |       |            |       |            |       |            |       |
| WT                                                   | TOTAL XIC P62     | 1.8E+08    | 98.06 | 2.9E+08    | 93.97 | 2.3E+08    | 95.67 | 1.6E+07    | 98.10 | 1.3E+07     | 98.01 | 1.1E+07    | 99.53 | 2.9E+07    | 99.43 | 6.5E+06    | 99.52 |
|                                                      | TOTAL XIC P62(OH) | 9.3E+09    |       | 4.5E+09    |       | 5.2E+09    |       | 8.1E+08    |       | 6.6E+08     |       | 2.4E+09    |       | 5.0E+09    |       | 1.4E+09    |       |
| % Arg67Lys Incorporation                             |                   | 2.47       |       | 1.85       |       | 10.20      |       | 6.29       |       | 6.84        |       |            |       |            |       |            |       |

**Table S1 (Related to Figure 4). List of uS12 peptides identified and quantitated from individual and control LCLs by mass spectrometry. Key:** XIC: Extracted ion chromatogram counts; ND: Not Detected – p.Arg67Lys Peptide not assigned by MS/MS in healthy control; <LOD: Below limit of detection or confounding co-eluting peptide interfering with quantitation; Ion intensities in bold assigned by MS/MS; Posttranslationally modified peptides: N(+.98) deamidation, Q(-17.03) pyroGlu, K(+43.01) carbamylation, K(+57.02) carbamidomethylation.



| Oligonucleotide name | Sequence (5' to 3')                                                                            |
|----------------------|------------------------------------------------------------------------------------------------|
| F-deltaB             | CTTACATGTTTAATATTGTAGATTCCAGAAGCAGGTAAGAACAACAAAC<br>TACAAGAAAAGCGGATCCCCGGGTTAATTAA           |
| R-deltaB             | CTTAAACATATACATACACAGTAGAATTTTTCGAATTATGAAATCGTAA<br>TATAACTCTGCGAATTCGAGCTCGTTTAAAC           |
| F-5'rps23b           | GCCTAGGTAGGTGGGCTAGC                                                                           |
| R-inhis5             | GCCAGATCTGTTTAGCTTGCC                                                                          |
| F-inhis5             | CAATCGTATGTGAATGCTG                                                                            |
| R-3'rps23b           | GTACAAGAGGTTGACTTCAAG                                                                          |
| F-GAL                | GTAATATCACAATGTTTCGACTAACGGTTACAGTACGTTAAATTAGATA<br>CTGCCTATGAATTGACATATTGAATTCGAGCTCGTTTAAAC |
| R-GAL                | CATACTTGTTTCTTCTGTGGACACGTAGCTTTCTAGCAGAGTTCAAAC<br>CTCTTGGCTTACCTTTACCCATTTTGAGATCCGGGTTTT    |
| F-inGAL              | GGTAATTAATCAGCGAAGC                                                                            |
| R-inrpS23a           | CCTCTTGGCTTACCTTTAC                                                                            |
| MutArg69Lys          | CAAGCAACCTAACTCTGCTATCAAAAAGTGTGTTAGAGTTCAATTAA                                                |
| MutArg69Glu          | GAATCCAAGCAACCTAACTCTGCTATCGAGAAGTGTGTTAGAGTTCAA<br>TTAATCAAG                                  |
| MutArg69His          | GAATCCAAGCAACCTAACTCTGCTATCCATAAGTGTGTTAGAGTTCAA<br>TTAATCAAG                                  |

|             |                                                             |
|-------------|-------------------------------------------------------------|
| MutLys62Arg | GAAAAATTGGGTATCGAATCCAGGCAACCTAACTCTGCTATC                  |
| nested-F    | CAGAAGGTCTGCTCTTGTGGCTGG                                    |
| nested-R    | GTCCTCGAGAGGATAACTTTCGTGC                                   |
| GWF         | GGGACAAGTTTGTACAAAAAAGCAGGCTACAAAATGGGTAAAGGTA<br>AGCCAAGAG |
| GWR         | GGGACCACTTTGTACAAGAAAGCTGGGTTTTATGATCTTGGCTTTTC<br>CTTCTTT  |

**Table S2 (related to Materials and Methods).** Oligonucleotides used for yeast experiments.
